# Supplementary material for: Delving into defence: identifying the Pseudomonas protegens Pf-5 gene suite involved in defence against secreted products of fungal, oomycete and bacterial rhizosphere competitors
Source: PubMed Central journal article supplement (PMC8743541; doi:10.1099/mgen.0.000671), 2021-11-17
Supplement: mgen-7-0671-s001.pdf [file mgen-7-0671-s001.pdf]

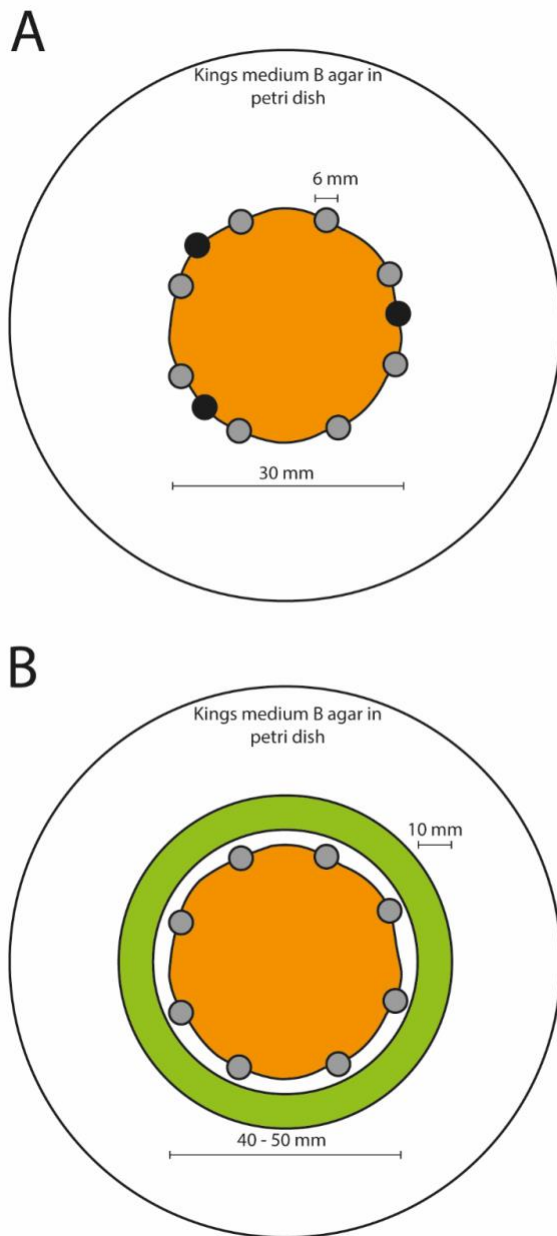

Figure S1. Diagrammatic representation of the layout for culturing of Pf-5 with secondary microbes on agar plates for HPLC analysis of metabolites (A) and TraDIS experiments (B). Growth of competitor microbes is shown as an orange region on the centre of the agar plates. Grey circles indicate the position of 6 mm diameter plugs taken from the agar plates in which WT Pf-5 cells were added to induce a competitive response. Black circles (A) indicate the position of the 6 mm plugs which were taken from the agar for HPLC analysis. The green ring (B) indicates the position of Pf-5 TraDIS library cells as they were placed on the agar plates in a ring around the growth of competitor microbes.

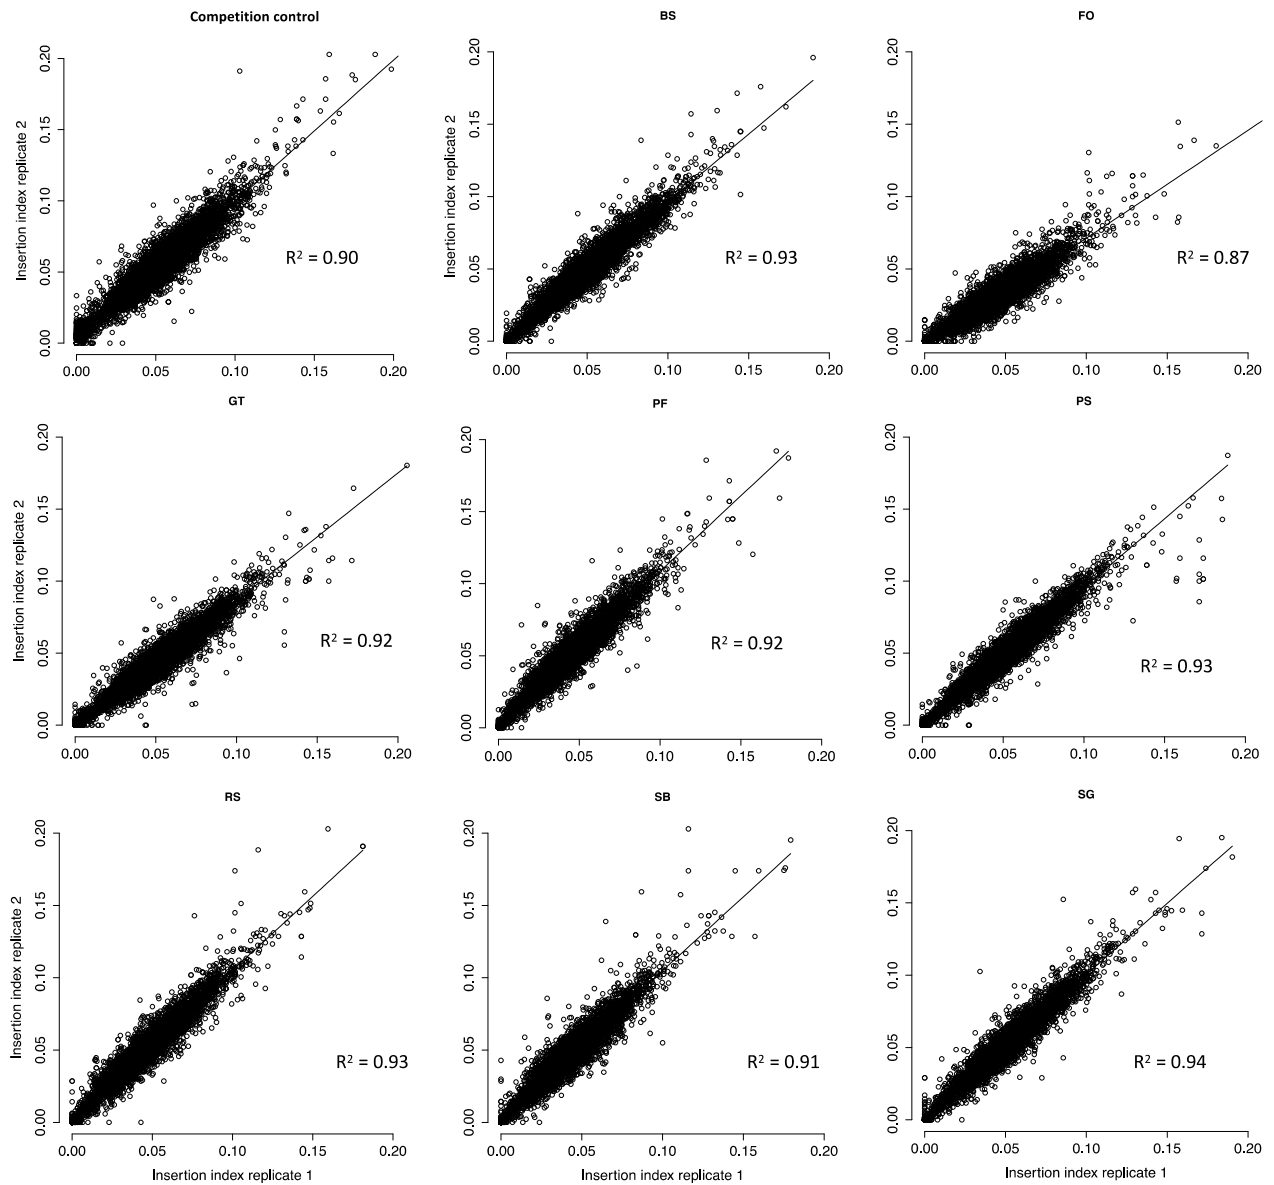

Figure S2. Correlation of gene insertion indexes for the two replicates of the *Pseudomonas protegens* Pf-5 mutant library for each fungal, bacterial or oomycete treatment\*. Insertion index is calculated as the number of transposon insertion sites in a gene divided by the gene length. \**Pythium spinosum* P.46.1 (PS), *Gaeumannomyces graminis* var. *tritici* (GT), *Fusarium oxysporum* (FO), *Rhizoctonia solani* (RS), *Bacillus subtilis* QST713 (BS), *Pseudomonas* sp. Q2-87 (PF), *Streptomyces bikiniensis* subspecies *bikiniensis* (SB) and *Streptomyces griseus*.

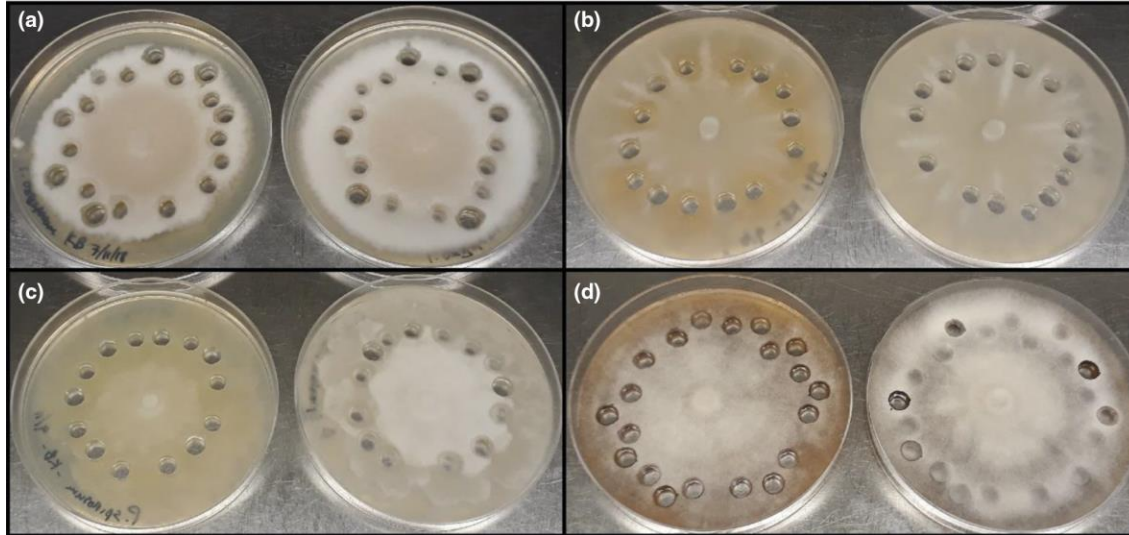

**Figure S3.** Examples of fungal and oomycete growth on Kings Medium B agar plates in the presence of live *Pseudomonas protegens* Pf-5 (left plate in each panel) and heat-treated killed *Pseudomonas protegens* Pf-5 (right plate in each panel). Plates are shown after two (b and c) or four (a and d) days of growth in the presence of Pf-5 which was placed in eight cored wells around the perimeter of the fungal or oomycete growth (20 ul of overnight culture per well). Fungal and oomycetes are *Fusarium oxysporum* (a), *Gaeumannomyces graminis var. tritici* (b), *Pythium spinosum* P.46.1 (c) and *Rhizoctonia solani* (d). Extra cored holes in the agar were taken for sampling and do not contain any additions.

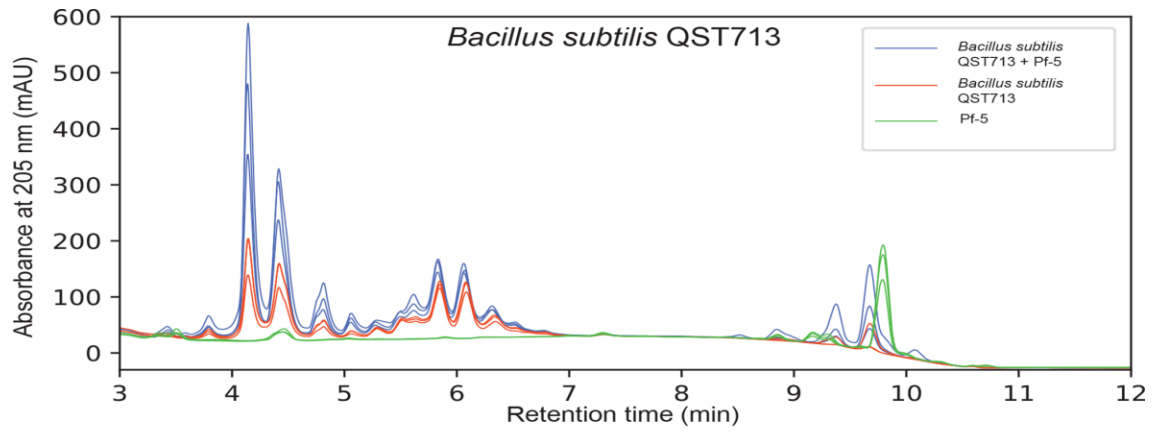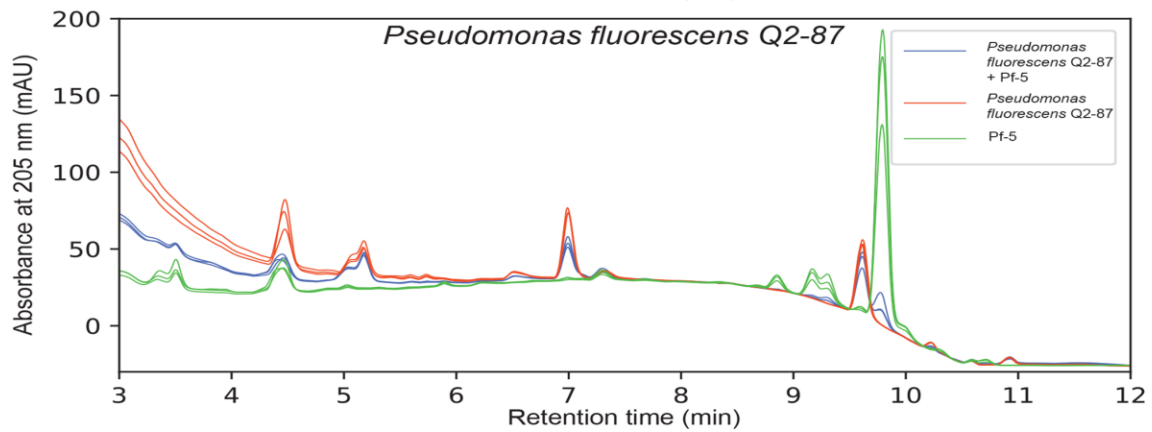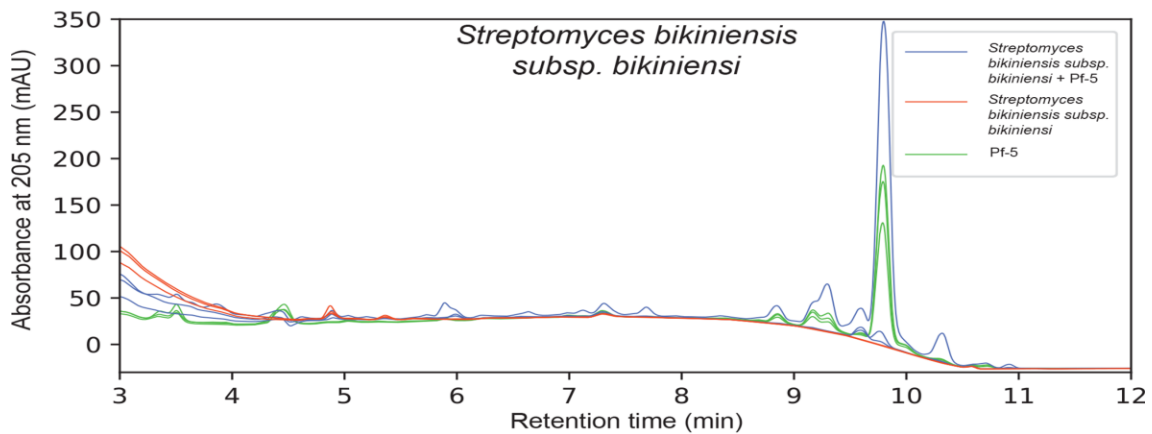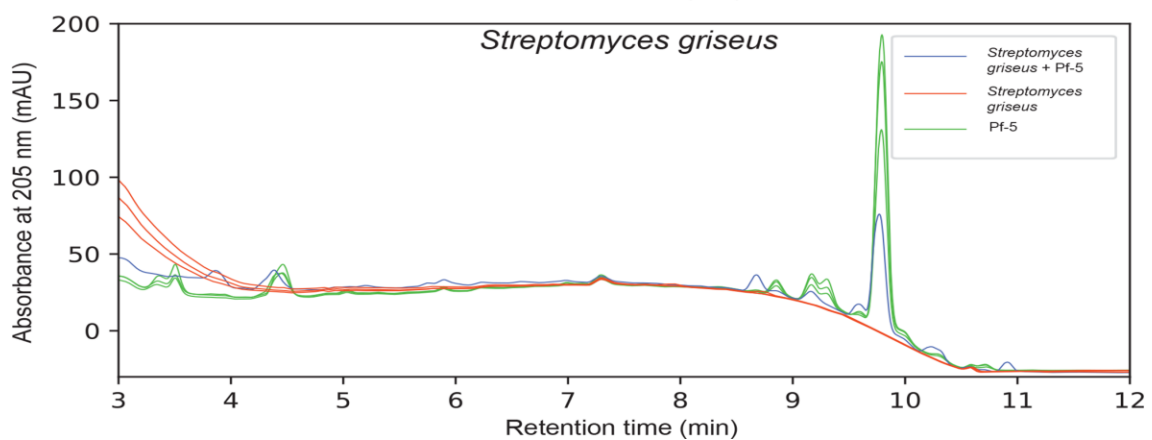

**Figure S4.** HPLC analysis of extracts from Kings medium B agar plates on which *Pseudomonas protegens* Pf-5 and bacterial competitors had been grown adjacent to each other for four days.

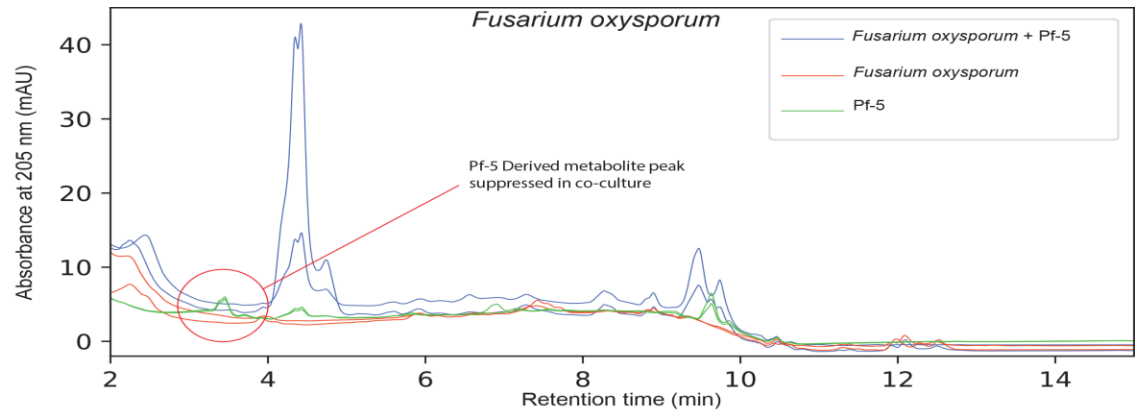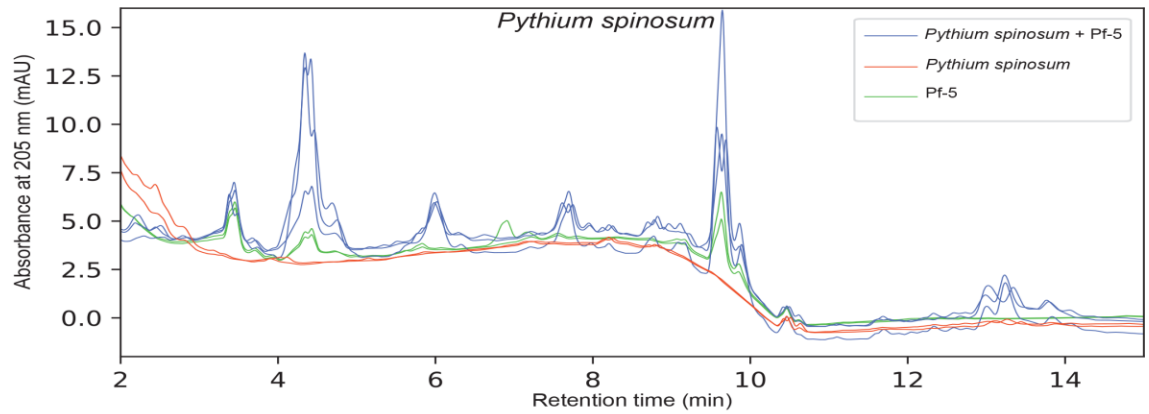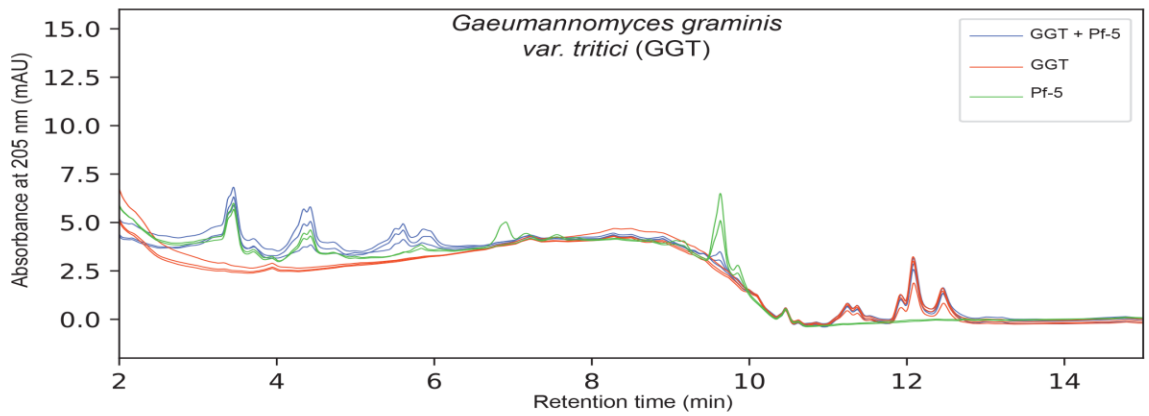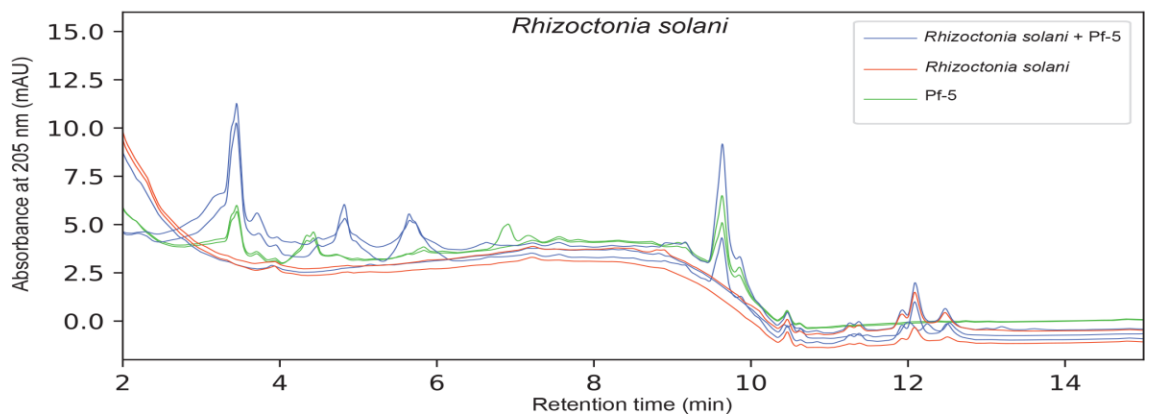

**Figure S5.** HPLC analysis of extracts from Kings medium B agar plates on which *Pseudomonas protegens* Pf-5 and fungal or oomycete competitors had been grown adjacent to each other for three days.

**Table S1. *Pseudomonas protegens* Pf-5 transposon mutant library metrics from Bio-Tradis pipeline analysis. Species indicates the fungal, bacterial or oomycete species the Pf-5 mutant library was grown alongside.**

| Species                                                       | Replicate | Total no. of reads | No. (%) of reads with matching transposon tag | No. (%) of aligned reads | No. of unique insertion sites | Average distance between unique insertion sites (bp) |
|---------------------------------------------------------------|-----------|--------------------|-----------------------------------------------|--------------------------|-------------------------------|------------------------------------------------------|
| Competition control                                           | 1         | 3,521,366          | 3,493,114 (99.2%)                             | 2,122,933 (60.8%)        | 343,890                       | 20.6                                                 |
| Competition control                                           | 2         | 4,758,755          | 4,712,581 (99.0%)                             | 2,167,937 (46.0%)        | 360,273                       | 19.6                                                 |
| <i>Fusarium oxysporum</i>                                     | 1         | 2,642,369          | 2,621,157 (99.2%)                             | 2,101,066 (80.2%)        | 276,294                       | 25.6                                                 |
| <i>Fusarium oxysporum</i>                                     | 2         | 2,655,603          | 2,634,749 (99.2%)                             | 2,081,423 (79.0%)        | 192,766                       | 36.7                                                 |
| <i>Gaeumannomyces graminis</i> var. <i>tritici</i>            | 1         | 2,792,201          | 2,772,558 (99.3%)                             | 2,141,123 (77.2%)        | 325,128                       | 21.8                                                 |
| <i>Gaeumannomyces graminis</i> var. <i>tritici</i>            | 2         | 1,718,549          | 1,701,172 (99.0%)                             | 1,072,535 (63.0%)        | 283,618                       | 24.9                                                 |
| <i>Pythium spinosum</i> P.46.1                                | 1         | 3,252,994          | 3,224,845 (99.1%)                             | 2,685,842 (83.3%)        | 331,752                       | 21.3                                                 |
| <i>Pythium spinosum</i> P.46.1                                | 2         | 1,813,018          | 1,797,481 (99.1%)                             | 1,482,807 (82.5%)        | 326,497                       | 21.7                                                 |
| <i>Rhizoctonia solani</i>                                     | 1         | 1,901,904          | 1,885,700 (99.1%)                             | 1,523,032 (80.8%)        | 297,582                       | 23.8                                                 |
| <i>Rhizoctonia solani</i>                                     | 2         | 3,450,805          | 3,425,670 (99.3%)                             | 2,748,627 (80.2%)        | 322,297                       | 22.0                                                 |
| <i>Bacillus subtilis</i> QST713                               | 1         | 2,127,655          | 2,118,255 (99.6%)                             | 2,050,590 (96.8%)        | 321,504                       | 22.0                                                 |
| <i>Bacillus subtilis</i> QST713                               | 2         | 2,830,068          | 2,817,579 (99.6%)                             | 2,705,823 (96.0%)        | 316,736                       | 22.3                                                 |
| <i>Pseudomonas</i> sp. Q2-87                                  | 1         | 2,076,259          | 2,067,020 (99.6%)                             | 2,019,326 (97.7%)        | 286,924                       | 24.7                                                 |
| <i>Pseudomonas</i> sp. Q2-87                                  | 2         | 3,362,868          | 3,347,914 (99.6%)                             | 3,267,865 (97.6%)        | 323,028                       | 21.9                                                 |
| <i>Streptomyces bikiniensis</i> subspecies <i>bikiniensis</i> | 1         | 2,434,801          | 2,424,021 (99.6%)                             | 2,367,645 (97.7%)        | 272,587                       | 26.0                                                 |



|                                                               |   |           |                   |                   |         |      |
|---------------------------------------------------------------|---|-----------|-------------------|-------------------|---------|------|
| <i>Streptomyces bikiniensis</i> subspecies <i>bikiniensis</i> | 2 | 3,296,639 | 3,282,155 (99.6%) | 3,202,667 (97.6%) | 298,110 | 23.7 |
| <i>Streptomyces griseus</i>                                   | 1 | 2,114,048 | 2,104,480 (99.5%) | 2,057,566 (97.8%) | 320,503 | 22.1 |
| <i>Streptomyces griseus</i>                                   | 2 | 2,414,029 | 2,403,225 (99.6%) | 2,346,208 (97.6%) | 328,174 | 21.6 |
